# Supplementary material for: Thermally induced hopping model for long-range triplet excitation energy transfer in DNA
Source: Royal Society of Chemistry journal article supplement (doi:10.1039/c7cp07811k), 2018-01-01
Supplement: c7cp07811k1.pdf [file c7cp07811k1.pdf]

## ELECTRONIC SUPPLEMENTARY INFORMATION

### Thermally Induced Hopping Model for Long-Range Triplet Excitation Energy Transfer in DNA

Lluís Blancafort<sup>a</sup> and Alexander A. Voityuk<sup>a,b</sup>

<sup>a</sup>*Institut de Química Computacional i Catàlisi and Departament de Química,  
Universitat de Girona, Facultat de Ciències, C/M. A. Campmany 69, 17003 Girona,  
Spain*

<sup>b</sup>*Institució Catalana de Recerca i Estudis Avançats (ICREA), Barcelona 08010, Spain*

#### Cartesian coordinates used for the electronic coupling calculations

|   |              |              |              |
|---|--------------|--------------|--------------|
| 1 | -5.171000000 | -0.628000000 | -3.343000000 |
| 6 | -4.089000000 | -0.533000000 | -3.383000000 |
| 6 | -3.467000000 | 0.596000000  | -2.849000000 |
| 1 | -4.061000000 | 1.376000000  | -2.381000000 |
| 6 | -2.078000000 | 0.724000000  | -2.909000000 |
| 1 | -1.600000000 | 1.596000000  | -2.474000000 |
| 6 | -1.297000000 | -0.284000000 | -3.494000000 |
| 6 | -1.932000000 | -1.428000000 | -4.004000000 |
| 1 | -1.316000000 | -2.215000000 | -4.426000000 |
| 6 | -3.318000000 | -1.546000000 | -3.961000000 |
| 1 | -3.799000000 | -2.430000000 | -4.371000000 |
| 6 | 0.205000000  | -0.246000000 | -3.522000000 |
| 8 | 0.833000000  | -1.299000000 | -3.467000000 |
| 6 | 0.932000000  | 1.056000000  | -3.614000000 |
| 6 | 2.260000000  | 1.098000000  | -3.166000000 |
| 1 | 2.689000000  | 0.195000000  | -2.744000000 |
| 6 | 3.022000000  | 2.259000000  | -3.254000000 |
| 1 | 4.040000000  | 2.259000000  | -2.884000000 |
| 6 | 2.461000000  | 3.411000000  | -3.828000000 |
| 8 | 3.109000000  | 4.597000000  | -3.971000000 |
| 6 | 4.454000000  | 4.695000000  | -3.520000000 |
| 1 | 4.531000000  | 4.512000000  | -2.441000000 |
| 1 | 4.765000000  | 5.718000000  | -3.736000000 |
| 1 | 5.109000000  | 3.995000000  | -4.055000000 |
| 6 | 1.141000000  | 3.377000000  | -4.306000000 |
| 1 | 0.734000000  | 4.273000000  | -4.765000000 |
| 6 | 0.388000000  | 2.218000000  | -4.194000000 |
| 1 | -0.623000000 | 2.206000000  | -4.587000000 |
| 7 | -1.284000000 | 4.500000000  | 0.000000000  |
| 6 | -1.537000000 | 3.133000000  | 0.000000000  |
| 8 | -2.659000000 | 2.661000000  | 0.000000000  |
| 7 | -0.371000000 | 2.383000000  | 0.000000000  |
| 6 | 0.962000000  | 2.836000000  | 0.000000000  |
| 8 | 1.880000000  | 2.030000000  | 0.000000000  |
| 6 | 1.108000000  | 4.299000000  | 0.000000000  |
| 6 | 2.499000000  | 4.880000000  | 0.000000000  |
| 6 | -0.019000000 | 5.048000000  | 0.000000000  |
| 1 | -2.108000000 | 5.087000000  | 0.000000000  |
| 1 | -0.498000000 | 1.377000000  | 0.000000000  |
| 1 | 0.006000000  | 6.134000000  | 0.000000000  |
| 1 | 3.225000000  | 4.064000000  | 0.000000000  |

|   |              |              |              |
|---|--------------|--------------|--------------|
| 1 | 2.683000000  | 5.499000000  | -0.885000000 |
| 1 | 2.683000000  | 5.499000000  | 0.886000000  |
| 7 | -1.291000000 | -4.498000000 | 0.000000000  |
| 6 | 0.029000000  | -4.903000000 | 0.000000000  |
| 7 | 0.881000000  | -3.907000000 | 0.000000000  |
| 6 | 0.073000000  | -2.780000000 | 0.000000000  |
| 6 | 0.360000000  | -1.398000000 | 0.000000000  |
| 7 | 1.627000000  | -0.925000000 | 0.000000000  |
| 7 | -0.661000000 | -0.522000000 | 0.000000000  |
| 6 | -1.914000000 | -1.006000000 | 0.000000000  |
| 7 | -2.325000000 | -2.278000000 | 0.000000000  |
| 6 | -1.283000000 | -3.120000000 | 0.000000000  |
| 1 | -2.113000000 | -5.085000000 | 0.000000000  |
| 1 | 0.296000000  | -5.952000000 | 0.000000000  |
| 1 | 2.410000000  | -1.560000000 | 0.000000000  |
| 1 | 1.780000000  | 0.072000000  | 0.000000000  |
| 1 | -2.701000000 | -0.254000000 | 0.000000000  |
| 7 | -3.688000000 | 2.880000000  | 3.380000000  |
| 6 | -2.858000000 | 3.984000000  | 3.380000000  |
| 7 | -1.584000000 | 3.679000000  | 3.380000000  |
| 6 | -1.575000000 | 2.292000000  | 3.380000000  |
| 6 | -0.530000000 | 1.343000000  | 3.380000000  |
| 7 | 0.773000000  | 1.705000000  | 3.380000000  |
| 7 | -0.842000000 | 0.034000000  | 3.380000000  |
| 6 | -2.140000000 | -0.311000000 | 3.380000000  |
| 7 | -3.220000000 | 0.476000000  | 3.380000000  |
| 6 | -2.872000000 | 1.770000000  | 3.380000000  |
| 1 | -4.698000000 | 2.872000000  | 3.380000000  |
| 1 | -3.259000000 | 4.989000000  | 3.380000000  |
| 1 | 1.033000000  | 2.679000000  | 3.380000000  |
| 1 | 1.482000000  | 0.988000000  | 3.380000000  |
| 1 | -2.334000000 | -1.382000000 | 3.380000000  |
| 7 | 1.606000000  | -4.395000000 | 3.380000000  |
| 6 | 0.598000000  | -3.438000000 | 3.380000000  |
| 8 | -0.587000000 | -3.716000000 | 3.380000000  |
| 7 | 1.101000000  | -2.146000000 | 3.380000000  |
| 6 | 2.445000000  | -1.729000000 | 3.380000000  |
| 8 | 2.714000000  | -0.537000000 | 3.380000000  |
| 6 | 3.423000000  | -2.827000000 | 3.380000000  |
| 6 | 4.890000000  | -2.479000000 | 3.380000000  |
| 6 | 2.952000000  | -4.095000000 | 3.380000000  |
| 1 | 1.285000000  | -5.355000000 | 3.380000000  |
| 1 | 0.406000000  | -1.407000000 | 3.380000000  |
| 1 | 3.610000000  | -4.959000000 | 3.380000000  |
| 1 | 4.998000000  | -1.392000000 | 3.380000000  |
| 1 | 5.403000000  | -2.872000000 | 4.265000000  |
| 1 | 5.403000000  | -2.872000000 | 2.494000000  |
| 7 | -4.677000000 | 0.169000000  | 6.760000000  |
| 6 | -3.455000000 | -0.494000000 | 6.760000000  |
| 8 | -3.352000000 | -1.707000000 | 6.760000000  |
| 7 | -2.381000000 | 0.384000000  | 6.760000000  |
| 6 | -2.400000000 | 1.791000000  | 6.760000000  |
| 8 | -1.350000000 | 2.415000000  | 6.760000000  |
| 6 | -3.746000000 | 2.382000000  | 6.760000000  |
| 6 | -3.869000000 | 3.885000000  | 6.760000000  |
| 6 | -4.807000000 | 1.542000000  | 6.760000000  |
| 1 | -5.489000000 | -0.433000000 | 6.760000000  |
| 1 | -1.463000000 | -0.048000000 | 6.760000000  |
| 1 | -5.832000000 | 1.901000000  | 6.760000000  |
| 1 | -2.869000000 | 4.323000000  | 6.760000000  |

|   |              |              |              |
|---|--------------|--------------|--------------|
| 1 | -4.401000000 | 4.251000000  | 5.875000000  |
| 1 | -4.401000000 | 4.251000000  | 7.646000000  |
| 7 | 3.879000000  | -2.618000000 | 6.760000000  |
| 6 | 4.672000000  | -1.488000000 | 6.760000000  |
| 7 | 3.988000000  | -0.369000000 | 6.760000000  |
| 6 | 2.666000000  | -0.790000000 | 6.760000000  |
| 6 | 1.441000000  | -0.090000000 | 6.760000000  |
| 7 | 1.382000000  | 1.262000000  | 6.760000000  |
| 7 | 0.292000000  | -0.790000000 | 6.760000000  |
| 6 | 0.365000000  | -2.131000000 | 6.760000000  |
| 7 | 1.448000000  | -2.915000000 | 6.760000000  |
| 6 | 2.571000000  | -2.184000000 | 6.760000000  |
| 1 | 4.183000000  | -3.581000000 | 6.760000000  |
| 1 | 5.752000000  | -1.558000000 | 6.760000000  |
| 1 | 2.228000000  | 1.810000000  | 6.760000000  |
| 1 | 0.482000000  | 1.715000000  | 6.760000000  |
| 1 | -0.593000000 | -2.647000000 | 6.760000000  |
| 7 | -3.879000000 | -2.618000000 | 10.140000000 |
| 6 | -4.672000000 | -1.488000000 | 10.140000000 |
| 7 | -3.988000000 | -0.369000000 | 10.140000000 |
| 6 | -2.666000000 | -0.790000000 | 10.140000000 |
| 6 | -1.441000000 | -0.090000000 | 10.140000000 |
| 7 | -1.382000000 | 1.262000000  | 10.140000000 |
| 7 | -0.292000000 | -0.790000000 | 10.140000000 |
| 6 | -0.365000000 | -2.131000000 | 10.140000000 |
| 7 | -1.448000000 | -2.915000000 | 10.140000000 |
| 6 | -2.571000000 | -2.184000000 | 10.140000000 |
| 1 | -4.183000000 | -3.581000000 | 10.140000000 |
| 1 | -5.752000000 | -1.558000000 | 10.140000000 |
| 1 | -2.228000000 | 1.810000000  | 10.140000000 |
| 1 | -0.482000000 | 1.715000000  | 10.140000000 |
| 1 | 0.593000000  | -2.647000000 | 10.140000000 |
| 7 | 4.677000000  | 0.169000000  | 10.140000000 |
| 6 | 3.455000000  | -0.494000000 | 10.140000000 |
| 8 | 3.352000000  | -1.707000000 | 10.140000000 |
| 7 | 2.381000000  | 0.384000000  | 10.140000000 |
| 6 | 2.400000000  | 1.791000000  | 10.140000000 |
| 8 | 1.350000000  | 2.415000000  | 10.140000000 |
| 6 | 3.746000000  | 2.382000000  | 10.140000000 |
| 6 | 3.869000000  | 3.885000000  | 10.140000000 |
| 6 | 4.807000000  | 1.542000000  | 10.140000000 |
| 1 | 5.489000000  | -0.433000000 | 10.140000000 |
| 1 | 1.463000000  | -0.048000000 | 10.140000000 |
| 1 | 5.832000000  | 1.901000000  | 10.140000000 |
| 1 | 2.869000000  | 4.323000000  | 10.140000000 |
| 1 | 4.401000000  | 4.251000000  | 11.025000000 |
| 1 | 4.401000000  | 4.251000000  | 9.254000000  |
| 7 | -1.606000000 | -4.395000000 | 13.520000000 |
| 6 | -0.598000000 | -3.438000000 | 13.520000000 |
| 8 | 0.587000000  | -3.716000000 | 13.520000000 |
| 7 | -1.101000000 | -2.146000000 | 13.520000000 |
| 6 | -2.445000000 | -1.729000000 | 13.520000000 |
| 8 | -2.714000000 | -0.537000000 | 13.520000000 |
| 6 | -3.423000000 | -2.827000000 | 13.520000000 |
| 6 | -4.890000000 | -2.479000000 | 13.520000000 |
| 6 | -2.952000000 | -4.095000000 | 13.520000000 |
| 1 | -1.285000000 | -5.355000000 | 13.520000000 |
| 1 | -0.406000000 | -1.407000000 | 13.520000000 |
| 1 | -3.610000000 | -4.959000000 | 13.520000000 |
| 1 | -4.998000000 | -1.392000000 | 13.520000000 |

|   |              |              |              |
|---|--------------|--------------|--------------|
| 1 | -5.403000000 | -2.872000000 | 12.635000000 |
| 1 | -5.403000000 | -2.872000000 | 14.406000000 |
| 7 | 3.688000000  | 2.880000000  | 13.520000000 |
| 6 | 2.858000000  | 3.984000000  | 13.520000000 |
| 7 | 1.584000000  | 3.679000000  | 13.520000000 |
| 6 | 1.575000000  | 2.292000000  | 13.520000000 |
| 6 | 0.530000000  | 1.343000000  | 13.520000000 |
| 7 | -0.773000000 | 1.705000000  | 13.520000000 |
| 7 | 0.842000000  | 0.034000000  | 13.520000000 |
| 6 | 2.140000000  | -0.311000000 | 13.520000000 |
| 7 | 3.220000000  | 0.476000000  | 13.520000000 |
| 6 | 2.872000000  | 1.770000000  | 13.520000000 |
| 1 | 4.698000000  | 2.872000000  | 13.520000000 |
| 1 | 3.259000000  | 4.989000000  | 13.520000000 |
| 1 | -1.033000000 | 2.679000000  | 13.520000000 |
| 1 | -1.482000000 | 0.988000000  | 13.520000000 |
| 1 | 2.334000000  | -1.382000000 | 13.520000000 |
